# Supplementary material for: Is volunteering a public health intervention? A systematic review and meta-analysis of the health and survival of volunteers
Source: BMC Public Health. 2013 Aug 23;13:773. doi: 10.1186/1471-2458-13-773 (PMC3766013; doi:10.1186/1471-2458-13-773)
Supplement: Additional file 5: Table S5 — Vote counting for experimental study designs (9 trials, 11 papers). [file 1471-2458-13-773-S5.docx]

**Table S5 Vote countinga for experimental study designs (9 trials, 11 papers)**

| Authors, year | N participants randomised  (n allocated to intervention, control) | N participants at final follow-up (n allocated to intervention, control) | Baseline mean age or range (years) | Baseline gender  (% female) | Physical activity | Self-rated health | Depression | Life satisfaction | Self-esteem | Cognitive function | Other outcomes |
| --- | --- | --- | --- | --- | --- | --- | --- | --- | --- | --- | --- |
| RCT (5 trials, 7 papers) | | | | | | | | | | | |
| Cohen, 2009 | 70 (35, 35) | 70 (35, 35) | Overall NR  41.6 (I)  41.8 (C) | Overall NR  60.0% (I)  54.5% (C) | - | - | - | - | - | - | √ Empowerment (composite of critical awareness, self-efficacy and interpersonal and political skills) |
| George & Singer, 2011 | 16 (8, 8) | 15 (8, 7) | Overall NR  85.7 (I)  81.4 (C) | 86.7% overall  87.5% (I)  85.7% (C) | - | - | = | - | - | = | √ Stress  = Sense of purpose  = Sense of usefulness |
| Rook & Sorkin, 2003 | 121 (52, 69) | 72 (20, 52) | Overall NR  69.6 (I)  68.9 (C) | Overall NR  67.3% (I)  69.6% (C) | - | - | = F1  = F2 | - | = F1  = F2 | - | = Loneliness (F1, F2) |
| Yuen et al, 2008 | 39 (19, 20) | 26 (13, 13) | 83.4 overall  83.0 (I)  83.9 (C) | 71.4% overall 80.0 % (I)  61.5% (C) | - | √ F1  =F2 | = F1  = F2 | = F1  = F2 | - | - | √ Wellbeingb |
| EC (3 papers) | | | | | | | | | | | |
| Carlson et al, 2008 | 149 (70, 58)  21 withdrew post randomisation | 110 ( 62,48) | 69 .0 overall  70.1 (I)  68.4 (C) | 90.0% overall  83.0% (I)  93.0% (C) | - | - | - | - | - | √ (3/6 outcomes)c | - |
| Fried et al, 2004 | 148 (70, 58)  20 withdrew post randomisation | 125 (69, 56) | 69.0 overall  (I and C NR) | 91.7% overall  88.6% (I)  94.8% (C) | √ (1/7 outcomes) | - | - | - | - | √ (1/5 outcomes)d | √ Strength  = Falls in last year  = Cane use  √ Walking speed |
| Tan et al, 2006 | 148 (70, 58)  20 withdrew post randomisation | 113 (59, 54) | 69.0 overall  (I and C NR) | 94%  92% (I)  96% (C) | =e | - | - | - | - | - | - |
| Non-RCTs (4 trials) | | | | | | | | | | | |
| Belgrave, 2011 | 27 | 26 (14, 12) | NR - retirement age | NR | - | - | - | - | = | - | - |
| Dabelko-Schoeny et al, 2010 | 54 (i and c NR) | 43 (22, 21) | Overall NR  77.0 (I)  76.0 (C) | Overall NR  82% (I)  76% (C) | - | = | - | - | = | - | = Purpose in life |
| Carlson et al, 2009f | 18 (9, 9) | 17 (8,9) | Overall NR  68.0 (I)  67.8 (C) | 100% overall | - | - | - | - | - | √ | - |
| Tan et al, 2009f | 221 (71, 150) | 221 (71, 150) | Overall NR  71.2 (I)  73.0 (C) | 100% overall | √ | - | - | - | - | - | - |

aFor each outcome, studies were categorised as either a statistically significant benefit (with p≤0.05) in favour of volunteering (√), no difference between groups (=), a statistically significant negative effect (with p≤0.05) of volunteering (X), or a dash (-) if the outcome was not used.

b Wellbeing was a composite score using self-rated health, depression and life satisfaction data in a multivariate nonparametric global statistical test. However, there were sufficient data for each component to calculate the impact of volunteering.

cSub group analysis stratified by baseline impairment (or not) suggests effects stronger in impaired sub group.

d Outcomes were self-reported cognitive activities outside the study which were different to those outcomes measured within the study by Carlson et al, 2008.

e Sub group analysis stratified by baseline activity (high or low) suggests significant effects in low activity sub group in 3/7 outcomes.

f These two papers report very different experiments using Experience Corp data and are therefore presented separately.

C, control group; F, follow- up; I, intervention group; NR, not reported
